# Supplementary material
Source: PubMed Central journal article supplement (PMC7307421)
Supplement: NIHMS1587703-supplement-Supplementary_Material.pdf [file NIHMS1587703-supplement-Supplementary_Material.pdf]

## Supplementary Information

**Indenoisoquinoline Topoisomerase Inhibitors Strongly Bind and Stabilize the *MYC***

**Promoter G-Quadruplex and Downregulate *MYC***

Kai-Bo Wang,<sup>1</sup> Mohamed S. A. Elsayed,<sup>1</sup> Guanhui Wu,<sup>1</sup> Nanjie Deng,<sup>2</sup> Mark  
Cushman,<sup>1,3,4</sup> and Danzhou Yang<sup>1,3,4\*</sup>

## Table of Contents

|                                                                                                                                                                                                            |     |
|------------------------------------------------------------------------------------------------------------------------------------------------------------------------------------------------------------|-----|
| <b>Table S1.</b> The DNA sequences and primers used in this study.....                                                                                                                                     | S3  |
| <b>Table S2.</b> Competitor binding affinities ( $K_i$ values) of the five indenoisoquinolines determined by competition fluorescence displacement experiments.....                                        | S4  |
| <b>Table S3.</b> MYC inhibition, Top1 inhibition, and $GI_{50}$ values of the 29 indenoisoquinolines .....                                                                                                 | S5  |
| <b>Table S4.</b> Raw $\log_{10}$ MGM data of the 29 indenoisoquinolines.....                                                                                                                               | S8  |
| <b>Figure S1.</b> Chemical structures of the 56 indenoisoquinoline analogs.....                                                                                                                            | S9  |
| <b>Figure S2.</b> Fluorescence emission spectra of 5'-BHQ-MycPu28-3'-FAM and 5'-BHQ-MycPu22-3'-FAM in the presence or absence of compound <b>5</b> .....                                                   | S11 |
| <b>Figure S3.</b> MYC protein expression levels in the absence and presence of various concentrations of indenoisoquinolines obtained by western blotting.....                                             | S12 |
| <b>Figure S4.</b> Native PAGE experiments of MycPu22 G-quadruplex DNA in the presence and absence of various indenoisoquinolines.....                                                                      | S14 |
| <b>Figure S5.</b> CD spectra of MycPu22 G-quadruplex DNA with addition of 1, 2, 3, and 4 equivalents of indenoisoquinoline compounds.....                                                                  | S15 |
| <b>Figure S6.</b> Apparent binding affinities of the five indenoisoquinolines with MycPu22 determined by fluorescence-based binding assay.....                                                             | S16 |
| <b>Figure S7.</b> Binding selectivities of MycG4-interactive indenoisoquinolines.....                                                                                                                      | S17 |
| <b>Figure S8.</b> Example dose response curves from the NCI-60 cancer cell line drug screen (Compound <b>12</b> ).....                                                                                     | S18 |
| <b>Figure S9.</b> Example of Mean Graph from the NCI-60 cancer cell line drug screen (compound <b>12</b> ).....                                                                                            | S19 |
| <b>Figure S10.</b> Bar graphs showing the antiproliferation profiles ( $GI_{50}$ ) of indenoisoquinoline <b>12</b> , <b>5</b> , <b>4</b> , and <b>20</b> from the NCI-60 cancer cell line drug screen..... | S20 |
| <b>References</b> .....                                                                                                                                                                                    | S21 |

**Table S1. The DNA sequences and primers used in this study.**

| <b>Sequence Name</b>   | <b>DNA Sequence (5' to 3')</b>   |
|------------------------|----------------------------------|
| MycPu28                | TGGGGAGGGTGGGGAGGGTGGGGAAGGT     |
| MycPu22                | TGAGGGTGGG TAGGGTGGGTAA          |
| K-RasG4                | AGGGCGGTGTGGGAAGAGGGAAGAGGGGGAGG |
| Telomeric G4           | TTAGGGTTAGGGTTAGGGTTAGGGTT       |
| <b>qRT-PCR Primers</b> |                                  |
| <i>MYC</i> Forward     | GCTGCTTAGACGCTGGATT              |
| <i>MYC</i> Reverse     | TCCTCCTCGTCGCAGTAGA              |
| <i>GAPDH</i> Forward   | CATGAGAAGTATGACAACAGCCT          |
| <i>GAPDH</i> Reverse   | AGTCCTTCCACGATACCAAAGT           |

**Table S2. Competitor binding affinities ( $K_i$ ) of the five indenoisoquinolines determined by competition fluorescence displacement experiments.**

| <b>Compound</b> | <b><math>K_i</math> (nM)</b> |                |                |                     |                                      |
|-----------------|------------------------------|----------------|----------------|---------------------|--------------------------------------|
|                 | <b>MycPu22</b>               | <b>MycPu28</b> | <b>K-RasG4</b> | <b>Telomeric G4</b> | <b>calf thymus dsDNA<sup>a</sup></b> |
| <b>5</b>        | 16                           | 18             | 21             | 164                 | ~11000                               |
| <b>6</b>        | 40                           | 33             | 32             | 286                 | ~12000                               |
| <b>9</b>        | 12                           | 11             | 11             | 28                  | 5171                                 |
| <b>12</b>       | 7                            | 7              | 7              | 14                  | 3624                                 |
| <b>13</b>       | 26                           | 19             | 23             | 146                 | 2138                                 |

<sup>a</sup>The  $K_i$  value of the calf thymus ds-DNA refers to the base-pair concentration.

**Table S3. MYC inhibition, Top1 inhibition, and GI<sub>50</sub> values of the 29 indenoisoquinolines.**

|                                   | 1                                                                      | 2    | 3     | 4     | 5    | 6    | 7    | 8    | 9     | 10   | 11   | 12    | 13    | 19    | 20   |
|-----------------------------------|------------------------------------------------------------------------|------|-------|-------|------|------|------|------|-------|------|------|-------|-------|-------|------|
| <b>MYC Inhibition<sup>a</sup></b> | +                                                                      | +++  | +++   | ++    | +++  | +++  | +++  | +    | +++   | +++  | +++  | +++   | +++   | +     | +    |
| <b>Top1 Inhibitor<sup>b</sup></b> | +                                                                      | ++   | ++    | +     | ++   | +    | ++   | +    | ++    | +++  | +++  | ++++  | ++++  | +++   | +++  |
| <b>MGM<sup>c</sup></b>            | 0.58                                                                   | 0.63 | 0.60  | 2.90  | 0.16 | 0.24 | 0.22 | 0.22 | 0.05  | 0.07 | 0.18 | 0.06  | 0.40  | 2.70  | 1.26 |
| <b>Cancer cell lines</b>          | <b>Antiproliferative activities [GI<sub>50</sub> (μM)]<sup>d</sup></b> |      |       |       |      |      |      |      |       |      |      |       |       |       |      |
| <b>Leukemia</b>                   |                                                                        |      |       |       |      |      |      |      |       |      |      |       |       |       |      |
| CCRF-CEM                          | 0.08                                                                   | 0.03 | 0.06  | 0.53  | 0.11 | 0.26 | 0.16 | 0.04 | <0.01 | 0.04 | 0.05 | <0.01 | 0.01  | 1.57  | 1.37 |
| HL-60 (TB)                        | 0.11                                                                   | 6.23 | 0.60  | 18.00 | 0.16 | 0.22 | 0.20 | 0.09 | 0.03  | 0.04 | 0.10 | <0.01 | 0.21  | 4.28  | 1.80 |
| K-562                             | 0.56                                                                   | 0.79 | 1.14  | 1.19  | 0.13 | 0.17 | 0.21 | 0.15 | 0.02  | 0.04 | 0.23 | 0.11  | 0.18  | 5.13  | 1.42 |
| MOLT-4                            | 0.04                                                                   | 0.02 | 0.04  | 0.35  | 0.04 | 0.04 | 0.05 | 0.03 | <0.01 | 0.03 | 0.03 | <0.01 | <0.01 | 0.87  | 0.29 |
| RPMI-8226                         | 0.87                                                                   | 5.26 | 1.47  | 13.90 | 0.15 | 0.20 | 0.14 | 0.05 | 0.04  | 0.08 | 0.17 | 0.03  | 0.10  | 1.85  | 1.84 |
| SR                                | 0.12                                                                   | 0.05 | 0.14  | 0.58  | 0.08 | 0.12 | 0.13 | 0.05 | <0.01 | 0.01 | 0.02 | <0.01 | <0.01 | 0.29  | 0.31 |
| <b>Lung</b>                       |                                                                        |      |       |       |      |      |      |      |       |      |      |       |       |       |      |
| A549                              | 0.06                                                                   | 0.61 | 0.45  | 4.17  | 0.07 | 0.11 | 0.06 | 0.02 | 0.05  | 0.07 | 0.12 | 0.04  | 0.06  | 1.96  | 0.59 |
| EKVX                              | 1.37                                                                   | 2.18 | 1.20  | 7.73  | 0.30 | 0.30 | 0.33 | 0.44 | 0.30  | 0.27 | 0.45 | 1.01  | 0.43  | 4.91  | ND   |
| HOP-62                            | 0.21                                                                   | 0.05 | 0.22  | 0.95  | 0.11 | 0.14 | 0.15 | 0.07 | <0.01 | 0.03 | 0.15 | 0.01  | 0.03  | 1.41  | 1.25 |
| HOP-92                            | 1.12                                                                   | 2.20 | 1.19  | 4.68  | 0.28 | 0.37 | 0.36 | 0.14 | 0.55  | 0.24 | 0.87 | 1.38  | 0.15  | 4.47  | 1.42 |
| NCI-H226                          | 1.04                                                                   | 3.27 | 1.35  | 12.30 | 0.15 | 0.16 | 0.14 | 0.15 | 0.10  | 0.09 | 0.17 | 0.04  | 1.42  | 2.79  | 1.32 |
| NCI-H23                           | 1.01                                                                   | 0.86 | 0.92  | 6.27  | 0.18 | 0.31 | 0.30 | 0.23 | 0.03  | 0.04 | 0.15 | 0.02  | 0.21  | 3.10  | 1.86 |
| NCI-H322M                         | 1.26                                                                   | 1.68 | 1.28  | 4.34  | 0.32 | 0.45 | 0.44 | 0.96 | 0.05  | 0.16 | 0.28 | 0.04  | 0.34  | 5.44  | 2.47 |
| NCI-H460                          | 0.04                                                                   | 0.02 | 0.05  | 0.38  | 0.04 | 0.05 | 0.03 | 0.03 | <0.01 | 0.02 | 0.04 | <0.01 | <0.01 | 0.44  | 0.41 |
| NCI-H522                          | 0.61                                                                   | 0.27 | 0.37  | 6.32  | 0.04 | 0.06 | 0.06 | 0.12 | 0.06  | 0.08 | 0.08 | <0.01 | 0.02  | 1.06  | 1.84 |
| <b>Colon</b>                      |                                                                        |      |       |       |      |      |      |      |       |      |      |       |       |       |      |
| COLO 205                          | 0.78                                                                   | 0.16 | 0.50  | 1.30  | 0.09 | 0.07 | 0.07 | 0.15 | 0.04  | 0.06 | 0.30 | 0.24  | 0.07  | 1.74  | 0.47 |
| HCC-2998                          | 1.29                                                                   | 5.07 | 1.41  | 11.30 | 0.40 | 1.15 | 1.06 | 1.05 | 0.16  | 0.20 | 0.30 | 1.03  | 0.19  | 3.44  | 2.17 |
| HCT-116                           | 0.30                                                                   | 0.10 | 0.55  | 0.98  | 0.09 | 0.14 | 0.14 | 0.09 | <0.01 | 0.03 | ND   | ND    | 0.04  | 1.27  | 0.44 |
| HCT-15                            | 0.26                                                                   | 1.73 | 1.11  | 4.08  | 0.16 | 0.25 | 0.23 | 0.13 | 0.06  | 0.12 | 0.30 | 1.17  | 0.15  | 2.90  | 1.03 |
| HT29                              | 0.66                                                                   | 0.16 | 1.08  | 1.37  | 0.07 | 0.15 | 0.15 | 0.15 | 0.02  | 0.06 | 0.15 | 0.03  | 0.12  | 2.48  | 1.01 |
| KM12                              | 0.55                                                                   | 2.11 | 1.10  | 3.37  | 0.17 | 0.24 | 0.26 | 0.17 | 0.14  | 0.16 | 0.40 | 1.11  | 0.19  | 3.80  | 1.61 |
| SW-620                            | 0.09                                                                   | 0.03 | 0.08  | 0.30  | 0.12 | 0.18 | 0.17 | 0.11 | <0.01 | 0.03 | 0.13 | 0.01  | 0.04  | 1.68  | 0.46 |
| <b>CNS</b>                        |                                                                        |      |       |       |      |      |      |      |       |      |      |       |       |       |      |
| SF-268                            | 1.07                                                                   | 0.17 | 0.40  | 4.75  | 0.21 | 0.38 | 0.39 | 0.28 | 0.02  | 0.07 | 0.08 | <0.01 | 0.07  | 1.75  | 2.15 |
| SF-295                            | 0.08                                                                   | 0.03 | 0.13  | 0.67  | 0.09 | 0.19 | 0.19 | 0.13 | <0.01 | 0.03 | 0.07 | 0.01  | 0.08  | 1.27  | 0.75 |
| SF-539                            | 1.33                                                                   | 1.98 | 0.73  | 2.15  | 0.25 | 0.37 | 0.32 | 0.53 | 0.03  | 0.05 | 0.31 | 0.04  | 0.11  | 1.96  | 0.85 |
| SNB-19                            | 1.06                                                                   | 1.03 | 0.61  | 13.80 | 0.18 | 0.22 | 0.16 | 0.13 | 0.04  | 0.04 | 0.11 | 0.01  | 0.11  | 2.13  | 1.75 |
| SNB-75                            | 0.29                                                                   | 0.35 | 0.26  | 0.93  | 0.22 | 0.25 | 0.36 | 0.37 | 0.05  | 0.13 | 0.27 | 0.03  | 0.23  | 3.63  | 0.66 |
| U251                              | 0.31                                                                   | 0.04 | 0.30  | 7.24  | 0.08 | 0.11 | 0.10 | 0.08 | 0.01  | 0.04 | 0.08 | <0.01 | 0.10  | 1.72  | 1.05 |
| <b>Melanoma</b>                   |                                                                        |      |       |       |      |      |      |      |       |      |      |       |       |       |      |
| LOX IMVI                          | 0.17                                                                   | 0.04 | 0.16  | 0.78  | 0.11 | 0.14 | 0.14 | 0.18 | <0.01 | 0.03 | 0.04 | <0.01 | 0.05  | 1.34  | 0.81 |
| MALME-3M                          | 1.54                                                                   | 5.90 | 1.48  | 5.77  | 0.20 | 0.32 | 0.33 | 1.13 | 0.06  | 0.18 | 0.34 | 0.62  | 0.21  | 4.49  | ND   |
| M14                               | 1.23                                                                   | 0.87 | 0.57  | 1.71  | 0.23 | 0.31 | 0.34 | 0.37 | <0.01 | 0.04 | 0.07 | <0.01 | 0.32  | 2.85  | 1.57 |
| MDA-MB-435                        | 1.25                                                                   | 5.06 | 1.07  | 1.53  | 0.31 | 0.47 | 0.48 | 0.58 | 0.06  | 0.15 | 0.42 | 0.48  | 0.39  | 4.67  | 1.93 |
| SK-MEL-2                          | 2.11                                                                   | 7.17 | 13.20 | 5.29  | 0.51 | 1.60 | 1.13 | 1.71 | 1.01  | 0.35 | 1.59 | 1.56  | 0.55  | 19.50 | 3.92 |
| SK-MEL-28                         | 1.81                                                                   | 8.34 | 1.62  | 2.30  | 0.94 | 1.44 | 1.23 | 1.52 | 10.60 | 0.39 | 1.13 | 1.18  | 1.11  | 8.03  | 1.56 |
| SK-MEL-5                          | 1.07                                                                   | 2.54 | 1.12  | 11.00 | 0.16 | 0.31 | 0.25 | 0.22 | 0.07  | 0.11 | 0.26 | 0.03  | 0.07  | 1.50  | 1.00 |
| UACC-257                          | 2.19                                                                   | 7.85 | 2.24  | 4.04  | 0.47 | 0.49 | 0.40 | 1.29 | 0.18  | 0.18 | 0.59 | 0.58  | 1.18  | 6.60  | 2.02 |
| UACC-62                           | 1.43                                                                   | 2.09 | 0.57  | 1.81  | 0.27 | 0.61 | 0.34 | 1.26 | 0.02  | 0.02 | 0.04 | <0.01 | 0.55  | 1.58  | 1.30 |
| <b>Ovarian</b>                    |                                                                        |      |       |       |      |      |      |      |       |      |      |       |       |       |      |
| IGROV1                            | 1.13                                                                   | 2.47 | 1.14  | 10.40 | 0.21 | 0.32 | 0.33 | 0.48 | 0.02  | 0.21 | 0.42 | 0.08  | ND    | ND    | 1.91 |
| OVCAR-3                           | 1.43                                                                   | 5.97 | 1.41  | 15.10 | 0.19 | 0.26 | 0.28 | 0.34 | 0.06  | 0.17 | 0.32 | 0.14  | 0.41  | 2.70  | 2.41 |
| OVCAR-4                           | 1.17                                                                   | 1.43 | 1.27  | 2.19  | 0.30 | 0.42 | 0.46 | 0.89 | 0.08  | 0.17 | 0.33 | 0.48  | 0.23  | 3.13  | 1.93 |
| OVCAR-5                           | 1.74                                                                   | 5.02 | 1.69  | 3.56  | 0.28 | 0.35 | 0.33 | 0.33 | 0.16  | 0.14 | 0.45 | 1.04  | 0.38  | 6.31  | 2.44 |
| OVCAR-8                           | 1.10                                                                   | 0.81 | 1.18  | 3.09  | 0.14 | 0.19 | 0.18 | 0.13 | 0.09  | 0.09 | 0.17 | 0.02  | 0.07  | 3.11  | 0.95 |
| NCI/ADR-RES                       | 1.09                                                                   | 0.22 | 0.54  | 0.98  | 0.23 | 0.43 | 0.37 | 0.86 | 0.03  | 0.06 | 0.13 | 0.02  | 1.04  | 3.14  | 2.72 |
| SK-OV-3                           | 1.16                                                                   | 1.47 | 0.66  | 10.10 | 0.22 | 0.23 | 0.22 | 0.21 | 0.03  | 0.06 | 0.14 | 0.01  | 0.22  | 2.67  | 2.22 |
| <b>Renal</b>                      |                                                                        |      |       |       |      |      |      |      |       |      |      |       |       |       |      |
| 786-0                             | 0.47                                                                   | 1.47 | 0.32  | 2.47  | 0.12 | 0.20 | 0.20 | 0.13 | 0.03  | 0.04 | 0.22 | 0.02  | 0.06  | 1.78  | 1.16 |
| A498                              | 0.55                                                                   | 0.38 | 0.53  | 0.96  | 0.20 | 0.37 | 0.25 | 0.35 | ND    | 0.03 | ND   | ND    | 0.13  | 1.64  | ND   |
| ACHN                              | 0.18                                                                   | 0.08 | 0.22  | 0.78  | 0.06 | 0.12 | 0.13 | 0.06 | <0.01 | 0.04 | 0.04 | <0.01 | 0.04  | 1.67  | 0.29 |
| CAKI-1                            | 0.41                                                                   | 0.03 | 0.06  | 2.97  | ND   | ND   | ND   | ND   | <0.01 | 0.03 | 0.04 | <0.01 | 0.24  | 3.17  | 0.57 |
| RXF 393                           | 1.04                                                                   | 0.70 | 1.30  | 1.90  | 0.23 | 0.32 | 0.26 | 0.27 | 0.06  | 0.07 | 0.39 | 0.03  | 0.96  | 7.16  | 2.31 |
| SN12C                             | 0.49                                                                   | 2.05 | 1.18  | 10.20 | 0.16 | 0.21 | 0.15 | 0.08 | 0.04  | 0.05 | 0.08 | <0.01 | 0.16  | 4.10  | 1.12 |
| TK-10                             | ND <sup>e</sup>                                                        | ND   | ND    | ND    | 0.18 | 0.33 | 0.30 | 0.27 | 0.37  | 0.32 | 0.73 | 1.34  | 0.41  | 4.63  | 3.02 |
| UO-31                             | 1.03                                                                   | 0.60 | 1.08  | 3.74  | 0.08 | 0.13 | 0.12 | 0.13 | <0.01 | 0.03 | 0.05 | <0.01 | 0.10  | 0.42  | 0.57 |
| <b>Prostate</b>                   |                                                                        |      |       |       |      |      |      |      |       |      |      |       |       |       |      |
| PC-3                              | 0.98                                                                   | 0.86 | 1.02  | 3.60  | 0.28 | 0.37 | 0.30 | 0.60 | 0.07  | 0.13 | 0.57 | 1.28  | 0.28  | 19.50 | 2.05 |
| DU-145                            | 0.24                                                                   | 0.19 | 0.33  | 3.18  | 0.21 | 0.20 | 0.22 | 0.06 | 0.02  | 0.05 | 0.06 | <0.01 | 0.06  | 2.31  | 1.89 |
| <b>Breast</b>                     |                                                                        |      |       |       |      |      |      |      |       |      |      |       |       |       |      |
| MCF7                              | 0.09                                                                   | 0.02 | 0.05  | 0.49  | 0.03 | 0.03 | 0.04 | 0.03 | <0.01 | 0.01 | 0.03 | <0.01 | <0.01 | 0.20  | 0.37 |
| MDA-MB-231                        | 1.35                                                                   | 6.15 | 1.62  | 10.70 | 0.40 | 0.70 | 0.40 | 0.48 | 0.68  | 0.27 | 0.63 | 1.61  | 0.68  | 11.20 | 2.58 |
| HS 578T                           | 1.49                                                                   | 6.87 | 1.84  | 12.90 | 0.75 | 2.24 | 1.62 | 2.08 | 1.91  | 1.17 | 3.85 | 1.82  | 0.66  | 8.95  | 3.08 |
| BT-549                            | 1.53                                                                   | 3.80 | 0.65  | 15.20 | 0.66 | 0.58 | 0.94 | 1.25 | 0.35  | 0.37 | 0.29 | 0.05  | 0.28  | 4.11  | 1.67 |
| T-47D                             | 8.98                                                                   | 1.21 | 1.12  | 22.80 | 0.08 | 0.16 | 0.15 | 0.27 | 0.02  | 0.03 | 0.11 | <0.01 | 0.05  | 1.07  | 2.04 |
| MDA-MB-468                        | 0.55                                                                   | 0.06 | 1.28  | 1.19  | 0.23 | 0.22 | 0.14 | 0.21 | 0.03  | 0.03 | 0.12 | 0.03  | ND    | ND    | 1.57 |

**Table S3. (continued)**

|                                   | 25                                                                     | 30    | 36   | 37    | 38   | 42    | 44    | 45    | 46    | 47    | 48    | 49    | 50    | 55    |
|-----------------------------------|------------------------------------------------------------------------|-------|------|-------|------|-------|-------|-------|-------|-------|-------|-------|-------|-------|
| <b>MYC Inhibitor<sup>a</sup></b>  | 0                                                                      | +     | +++  | +++   | +    | ++    | ++    | +     | +     | ++    | +     | +     | ++    | +     |
| <b>Top1 Inhibitor<sup>b</sup></b> | ++                                                                     | 0     | ++   | ++    | ++   | ++++  | ++++  | +++   | +++   | ++++  | +     | +     | ++++  | ++    |
| <b>MGM<sup>c</sup></b>            | 0.79                                                                   | 0.60  | 0.20 | 0.74  | 0.07 | 0.08  | 0.21  | 0.16  | 0.88  | 0.35  | 0.77  | 12.00 | 0.11  | 0.60  |
| <b>Cancer cell lines</b>          | <b>Antiproliferative activities [GI<sub>50</sub> (μM)]<sup>d</sup></b> |       |      |       |      |       |       |       |       |       |       |       |       |       |
| <b>Leukemia</b>                   |                                                                        |       |      |       |      |       |       |       |       |       |       |       |       |       |
| CCRF-CEM                          | 0.34                                                                   | 0.03  | 0.05 | 0.66  | 0.11 | <0.01 | <0.01 | <0.01 | <0.01 | <0.01 | 0.30  | 2.44  | <0.01 | <0.01 |
| HL-60 (TB)                        | 1.17                                                                   | 0.03  | 0.08 | 0.59  | 1.48 | 0.02  | <0.01 | 0.22  | 0.25  | 1.60  | <0.01 | 19.50 | 0.29  | 0.30  |
| K-562                             | 0.83                                                                   | 0.34  | 0.09 | 2.25  | 0.77 | 1.49  | 0.02  | 0.09  | 0.28  | ND    | 1.59  | 6.49  | <0.01 | 0.19  |
| MOLT-4                            | 0.10                                                                   | 0.02  | 0.03 | 0.24  | 0.15 | <0.01 | <0.01 | <0.01 | <0.01 | <0.01 | 0.42  | <0.01 | <0.01 | <0.01 |
| RPMI-8226                         | 0.27                                                                   | 0.12  | 0.12 | 0.70  | 1.02 | <0.01 | 0.01  | <0.01 | 0.48  | 0.30  | 0.20  | 2.39  | 0.02  | 0.25  |
| SR                                | 0.31                                                                   | 0.02  | 0.03 | 0.03  | 0.04 | <0.01 | <0.01 | <0.01 | ND    | <0.01 | ND    | ND    | <0.01 | <0.01 |
| <b>Lung</b>                       |                                                                        |       |      |       |      |       |       |       |       |       |       |       |       |       |
| A549                              | 0.22                                                                   | 0.06  | 0.52 | ND    | 1.31 | 10.50 | 0.03  | 0.11  | 0.74  | 0.89  | 0.65  | 18.70 | <0.01 | 0.11  |
| EKVX                              | 1.18                                                                   | 2.91  | ND   | ND    | ND   | 70.70 | 0.26  | ND    | 2.06  | 1.46  | 1.31  | 17.70 | 2.57  | ND    |
| HOP-62                            | 1.06                                                                   | 0.18  | 0.12 | 0.59  | 0.46 | <0.01 | 0.01  | 0.06  | 0.05  | ND    | 0.42  | 18.00 | <0.01 | 0.19  |
| HOP-92                            | 1.72                                                                   | 0.13  | 0.28 | 13.60 | 1.34 | 0.19  | 0.83  | 1.65  | 3.27  | 1.30  | ND    | 19.80 | <0.01 | 1.66  |
| NCI-H226                          | 0.56                                                                   | 0.27  | 0.45 | ND    | 1.18 | 0.37  | 0.21  | 1.39  | 0.65  | 1.40  | 0.66  | 13.90 | 0.05  | 2.12  |
| NCI-H23                           | 1.05                                                                   | 0.24  | 0.17 | 0.68  | 0.38 | 0.09  | <0.01 | 0.13  | 0.05  | 0.19  | 0.71  | 11.90 | <0.01 | 0.71  |
| NCI-H322M                         | 0.45                                                                   | 7.05  | 0.66 | 72.60 | 1.39 | <0.01 | 0.05  | ND    | 0.53  | 1.56  | 1.05  | 15.60 | 3.18  | 1.00  |
| NCI-H460                          | 0.31                                                                   | 0.04  | 0.03 | 0.24  | 0.37 | <0.01 | <0.01 | 0.02  | 0.43  | 0.28  | 0.24  | 5.81  | <0.01 | 0.03  |
| NCI-H522                          | 0.96                                                                   | 0.84  | 0.05 | 0.10  | 0.78 | <0.01 | <0.01 | 0.07  | 0.40  | 0.31  | 13.10 | 15.40 | 0.02  | 0.04  |
| <b>Colon</b>                      |                                                                        |       |      |       |      |       |       |       |       |       |       |       |       |       |
| COLO 205                          | 0.62                                                                   | 4.92  | 7.76 | 7.90  | 0.69 | <0.01 | 0.38  | 0.30  | 0.08  | 0.94  | 1.14  | 10.30 | <0.01 | 0.31  |
| HCC-2998                          | 0.35                                                                   | 10.00 | 1.42 | 37.10 | 0.62 | 29.30 | ND    | 0.10  | ND    | 0.13  | 0.14  | ND    | ND    | 3.32  |
| HCT-116                           | ND <sup>e</sup>                                                        | 0.39  | 0.22 | 0.74  | 0.15 | 0.17  | 0.07  | 0.12  | 0.13  | 0.22  | 0.12  | 1.49  | <0.01 | 0.16  |
| HCT-15                            | 0.73                                                                   | 0.09  | 1.53 | <0.01 | 1.49 | <0.01 | 0.55  | 0.14  | 0.91  | 0.20  | 1.11  | 16.00 | 0.07  | 1.02  |
| HT29                              | 0.35                                                                   | 0.34  | 1.18 | 4.08  | 0.48 | <0.01 | <0.01 | 0.09  | ND    | 0.07  | 1.04  | 16.90 | <0.01 | 0.32  |
| KM12                              | 1.13                                                                   | 0.53  | 1.04 | 9.39  | 1.34 | <0.01 | 0.26  | 0.15  | 1.00  | 1.29  | 0.68  | 12.80 | 1.62  | 1.01  |
| SW-620                            | 0.16                                                                   | 0.20  | 0.08 | 0.81  | 0.34 | 0.06  | 0.11  | 0.13  | 0.25  | <0.01 | 0.57  | 11.20 | <0.01 | 0.11  |
| <b>CNS</b>                        |                                                                        |       |      |       |      |       |       |       |       |       |       |       |       |       |
| SF-268                            | 0.95                                                                   | 1.85  | 0.04 | 0.27  | 0.55 | ND    | 0.11  | 1.20  | 0.38  | 1.11  | 2.41  | 11.90 | <0.01 | 0.07  |
| SF-295                            | 1.16                                                                   | 0.36  | 0.18 | 0.33  | 0.28 | <0.01 | <0.01 | <0.01 | 0.87  | 0.02  | 0.57  | 10.70 | <0.01 | 0.03  |
| SF-539                            | 1.61                                                                   | 1.04  | 0.27 | 0.37  | 0.67 | <0.01 | ND    | 0.01  | 0.25  | 0.16  | 0.64  | 17.70 | <0.01 | 0.24  |
| SNB-19                            | 0.54                                                                   | 0.33  | 0.39 | 12.80 | 1.08 | <0.01 | ND    | ND    | 0.02  | 0.55  | 1.39  | <0.01 | <0.01 | 0.31  |
| SNB-75                            | 0.95                                                                   | 1.39  | 0.21 | 2.97  | 0.16 | 0.23  | 0.01  | 0.13  | ND    | 0.79  | 1.30  | 16.00 | <0.01 | 0.40  |
| U251                              | 0.64                                                                   | 0.18  | 0.12 | 0.27  | 0.33 | <0.01 | <0.01 | 0.03  | 0.01  | 0.06  | 0.52  | 11.40 | <0.01 | 0.05  |
| <b>Melanoma</b>                   |                                                                        |       |      |       |      |       |       |       |       |       |       |       |       |       |
| LOX IMVI                          | 0.15                                                                   | 0.10  | 0.09 | 0.30  | 0.30 | 0.06  | <0.01 | 0.11  | 0.03  | 0.07  | 0.46  | 3.81  | <0.01 | 0.05  |
| MALME-3M                          | 1.42                                                                   | 0.93  | 1.16 | 1.79  | 2.16 | 1.60  | 0.15  | 1.01  | 0.69  | 1.07  | ND    | 24.80 | <0.01 | 1.25  |
| M14                               | 1.05                                                                   | 1.65  | 0.08 | ND    | 0.46 | <0.01 | 0.01  | 0.32  | 0.37  | 1.10  | 1.34  | ND    | ND    | 0.15  |
| MDA-MB-435                        | 1.20                                                                   | 10.30 | 0.89 | 2.84  | 1.30 | <0.01 | 0.53  | 1.23  | 0.36  | 0.65  | 1.81  | <0.01 | <0.01 | 0.95  |
| SK-MEL-2                          | 1.71                                                                   | 18.20 | 9.44 | 30.80 | 2.18 | <0.01 | 1.62  | 1.93  | 3.39  | 4.99  | 3.01  | <0.01 | 19.60 | 5.32  |
| SK-MEL-28                         | 1.53                                                                   | 2.01  | 1.37 | 16.40 | 1.88 | <0.01 | 0.17  | 1.27  | 0.25  | 1.48  | 1.42  | 16.50 | 0.68  | 11.80 |
| SK-MEL-5                          | 0.70                                                                   | 0.48  | 0.22 | 1.67  | 1.26 | 0.22  | 0.14  | 1.33  | 0.48  | 0.33  | 2.26  | 14.20 | 0.21  | 1.15  |
| UACC-257                          | 1.69                                                                   | 12.30 | 0.48 | 25.30 | 1.57 | <0.01 | 0.29  | 1.54  | 0.95  | 1.34  | 7.72  | <0.01 | 0.12  | 0.70  |
| UACC-62                           | 1.03                                                                   | 0.72  | 0.05 | 0.21  | 0.95 | <0.01 | 0.03  | 0.36  | 0.27  | 0.54  | 1.38  | 15.10 | 0.01  | 0.33  |
| <b>Ovarian</b>                    |                                                                        |       |      |       |      |       |       |       |       |       |       |       |       |       |
| IGROV1                            | 0.84                                                                   | 0.58  | 1.52 | 11.30 | 1.24 | 6.72  | 0.27  | 0.32  | 2.57  | 1.04  | 18.90 | 7.05  | 0.02  | 0.11  |
| OVCAR-3                           | 1.05                                                                   | 6.09  | 0.57 | 1.35  | 1.69 | 16.40 | 0.58  | 0.43  | 0.10  | 1.19  | 0.71  | 15.30 | 0.04  | 1.23  |
| OVCAR-4                           | 0.34                                                                   | 1.45  | 1.29 | 1.41  | 1.11 | <0.01 | 0.12  | 0.14  | 0.10  | 0.33  | 0.25  | 4.17  | 1.48  | 2.21  |
| OVCAR-5                           | 2.12                                                                   | 1.51  | 3.60 | <0.01 | 1.67 | <0.01 | 0.15  | 0.25  | 0.79  | ND    | 1.53  | 17.60 | 0.13  | 12.80 |
| OVCAR-8                           | 0.40                                                                   | 0.16  | 0.45 | 0.89  | 1.01 | 1.03  | 0.11  | 0.14  | 0.28  | 0.48  | 0.59  | 18.10 | <0.01 | 0.34  |
| NCI/ADR-RES                       | 1.16                                                                   | 1.48  | 0.28 | <0.01 | 2.55 | 0.35  | ND    | ND    | 8.70  | 0.03  | 2.44  | 1.55  | <0.01 | 1.50  |
| SK-OV-3                           | 1.05                                                                   | 1.21  | 0.24 | 0.56  | 1.15 | <0.01 | 0.60  | 1.40  | ND    | 1.29  | 2.18  | 12.30 | <0.01 | 0.21  |
| <b>Renal</b>                      |                                                                        |       |      |       |      |       |       |       |       |       |       |       |       |       |
| 786-0                             | 1.34                                                                   | 0.22  | 0.21 | 0.33  | 0.34 | <0.01 | <0.01 | 0.11  | 0.09  | 0.17  | 0.76  | 12.90 | <0.01 | 0.29  |
| A498                              | ND                                                                     | 10.60 | 0.07 | ND    | 0.96 | 7.17  | 0.38  | 1.13  | ND    | 20.20 | 5.94  | ND    | 1.52  | ND    |
| ACHN                              | 0.39                                                                   | 0.09  | 0.05 | 0.31  | 0.28 | <0.01 | <0.01 | 0.09  | 0.11  | 0.15  | 0.64  | 10.10 | <0.01 | 0.07  |
| CAKI-1                            | 1.05                                                                   | ND    | 0.12 | 0.22  | 0.29 | 0.32  | <0.01 | 0.11  | 0.29  | 0.20  | 0.38  | 10.30 | <0.01 | 0.10  |
| RXF 393                           | 1.29                                                                   | 1.66  | 0.46 | 1.35  | 1.13 | 8.00  | 0.14  | 0.62  | 2.97  | 2.48  | 1.30  | 20.50 | 0.05  | 0.80  |
| SN12C                             | 0.33                                                                   | 0.25  | 0.20 | 0.42  | 0.45 | <0.01 | <0.01 | 0.59  | 0.26  | 0.94  | 0.44  | 11.40 | <0.01 | 0.24  |
| TK-10                             | 1.33                                                                   | 2.75  | 2.12 | 2.54  | 1.85 | 73.70 | ND    | ND    | 2.95  | 1.66  | 0.52  | 17.10 | 12.50 | ND    |
| UO-31                             | 0.77                                                                   | 0.30  | 0.07 | ND    | 0.69 | 0.03  | 0.02  | 0.29  | 16.90 | 1.05  | 3.75  | 20.60 | 0.15  | 0.32  |
| <b>Prostate</b>                   |                                                                        |       |      |       |      |       |       |       |       |       |       |       |       |       |
| PC-3                              | 0.86                                                                   | 1.21  | 0.67 | 7.22  | 0.64 | 34.90 | ND    | ND    | 1.15  | ND    | 1.13  | 15.80 | 0.50  | 0.62  |
| DU-145                            | 0.33                                                                   | 0.20  | 0.14 | 0.33  | 0.43 | <0.01 | <0.01 | 0.05  | 0.25  | 0.16  | 0.11  | 10.60 | <0.01 | 0.04  |
| <b>Breast</b>                     |                                                                        |       |      |       |      |       |       |       |       |       |       |       |       |       |
| MCF7                              | 0.30                                                                   | 0.04  | 0.05 | 0.08  | 0.16 | <0.01 | <0.01 | <0.01 | 0.36  | 0.09  | 0.38  | 8.82  | <0.01 | 0.07  |
| MDA-MB-231                        | 0.51                                                                   | 1.27  | 2.06 | 18.10 | 1.57 | 77.80 | 0.46  | 0.25  | 0.64  | 0.97  | 0.68  | 15.30 | 0.15  | 1.59  |
| HS 578T                           | 1.44                                                                   | 4.90  | 1.97 | <0.01 | ND   | 54.20 | 2.03  | 2.29  | 0.55  | 1.93  | 2.85  | 13.90 | 1.52  | 4.70  |
| BT-549                            | 1.27                                                                   | 3.10  | 0.12 | 0.35  | 0.36 | ND    | 0.75  | 1.30  | 0.88  | ND    | 2.41  | 80.80 | 2.40  | 5.51  |
| T-47D                             | 1.55                                                                   | 0.63  | 0.56 | 12.00 | 0.70 | <0.01 | 0.02  | 0.12  | 0.07  | 0.50  | 0.73  | ND    | <0.01 | 0.55  |
| MDA-MB-468                        | 0.95                                                                   | 7.84  | 0.14 | ND    | 0.24 | ND    |

- <sup>a</sup> The MYC inhibition levels were determined based on the western blotting results as shown in Figures 3A and S2. MYC inhibition levels were classified into four levels: strong inhibition, +++, MYC expression inhibited at 0.5 to 1.0  $\mu\text{M}$ ; medium inhibition, ++, MYC expression inhibited at 2.0  $\mu\text{M}$ , or no clear dose-dependent MYC inhibition; weak inhibition, +, MYC expression inhibited at 4.0  $\mu\text{M}$ ; no inhibition, 0, no MYC expression inhibition up to 4.0  $\mu\text{M}$ .
- <sup>b</sup> The relative topoisomerase I (Top1) inhibition levels of the compounds were previously determined and classified into six levels (0 – 5, +++++ = 5).<sup>1-9</sup>
- <sup>c</sup> The MGM values for each compound are the average of  $\text{GI}_{50}$  values across the entire panel of NCI-60 cancer cell lines, where compounds with  $\text{GI}_{50}$  values that fall outside the test range of  $10^{-4}$  to  $10^{-8}$  M are assigned values of  $10^{-4}$  or  $10^{-8}$  M.
- <sup>d</sup> The antiproliferative activities ( $\text{GI}_{50}$  values) listed are the concentrations corresponding to 50% growth inhibition which were determined in the NCI-60 cancer cell lines drug screen.
- <sup>e</sup>  $\text{GI}_{50}$  value not determined.

**Table S4. Raw  $\log_{10}$ MGM data of the 29 indenoisoquinolines.**

The 29 indenoisoquinolines were grouped by their MYC inhibition levels and topoisomerase I inhibition levels. The overall anticancer activity of each group was determined by the  $mean(\log_{10}\text{MGM})$  value.

| $\log_{10}$ MGM<br>( $\mu\text{M}$ ) |   | MYC Inhibition Levels*                             |                     |                           |                    |
|--------------------------------------|---|----------------------------------------------------|---------------------|---------------------------|--------------------|
|                                      |   | 3                                                  | 2                   | 1                         | 0                  |
| Topoisomerase I Inhibition Levels**  | 0 |                                                    |                     | -0.22                     |                    |
|                                      |   |                                                    |                     | <b>Mean: -0.22</b>        |                    |
|                                      | 1 | -0.62***                                           | 0.46                | -0.66, -0.24, -0.12, 1.08 |                    |
|                                      |   | <b>Mean: -0.62****</b>                             | <b>Mean: 0.46</b>   | <b>Mean: 0.02</b>         |                    |
|                                      | 2 | -1.35, -0.78, -0.70, -0.66,<br>-0.22, -0.20, -0.13 |                     | -1.18, -0.22              | -0.10              |
|                                      |   | <b>Mean: -0.58</b>                                 |                     | <b>Mean: -0.70</b>        | <b>Mean: -0.10</b> |
|                                      | 3 | -1.13, -0.75                                       |                     | -0.80, -0.06, 0.10, 0.43  |                    |
|                                      |   | <b>Mean: -0.94</b>                                 |                     | <b>Mean: -0.08</b>        |                    |
|                                      | 4 | -1.26, -0.40                                       | -0.95, -0.68, -0.46 |                           |                    |
|                                      |   | <b>Mean: -0.83</b>                                 | <b>Mean: -0.69</b>  |                           |                    |
|                                      | 5 |                                                    | -1.10               |                           |                    |
|                                      |   |                                                    | <b>Mean: -1.10</b>  |                           |                    |

\* The MYC inhibition levels were determined based on the western blotting results as shown in Figures 3A and S2 (3 = strong, 2 = medium, 1 = weak, and 0 = no inhibition).

\*\* The topoisomerase I inhibition levels were previously determined.<sup>1-9</sup>

\*\*\*  $\log_{10}$ MGM value of each individual compound. The MGM values for each compound are the average of  $\text{GI}_{50}$  values across the entire panel of NCI-60 cancer cell lines, where compounds with  $\text{GI}_{50}$  values that fall outside the test range of  $10^{-4}$  to  $10^{-8}$  M are assigned values of  $10^{-4}$  or  $10^{-8}$  M. 50% growth inhibition ( $\text{GI}_{50}$ ) values were determined in the NCI-60 cancer cell lines drug screen.

\*\*\*\* The  $mean(\log_{10}\text{MGM})$  value of all compounds in each group.



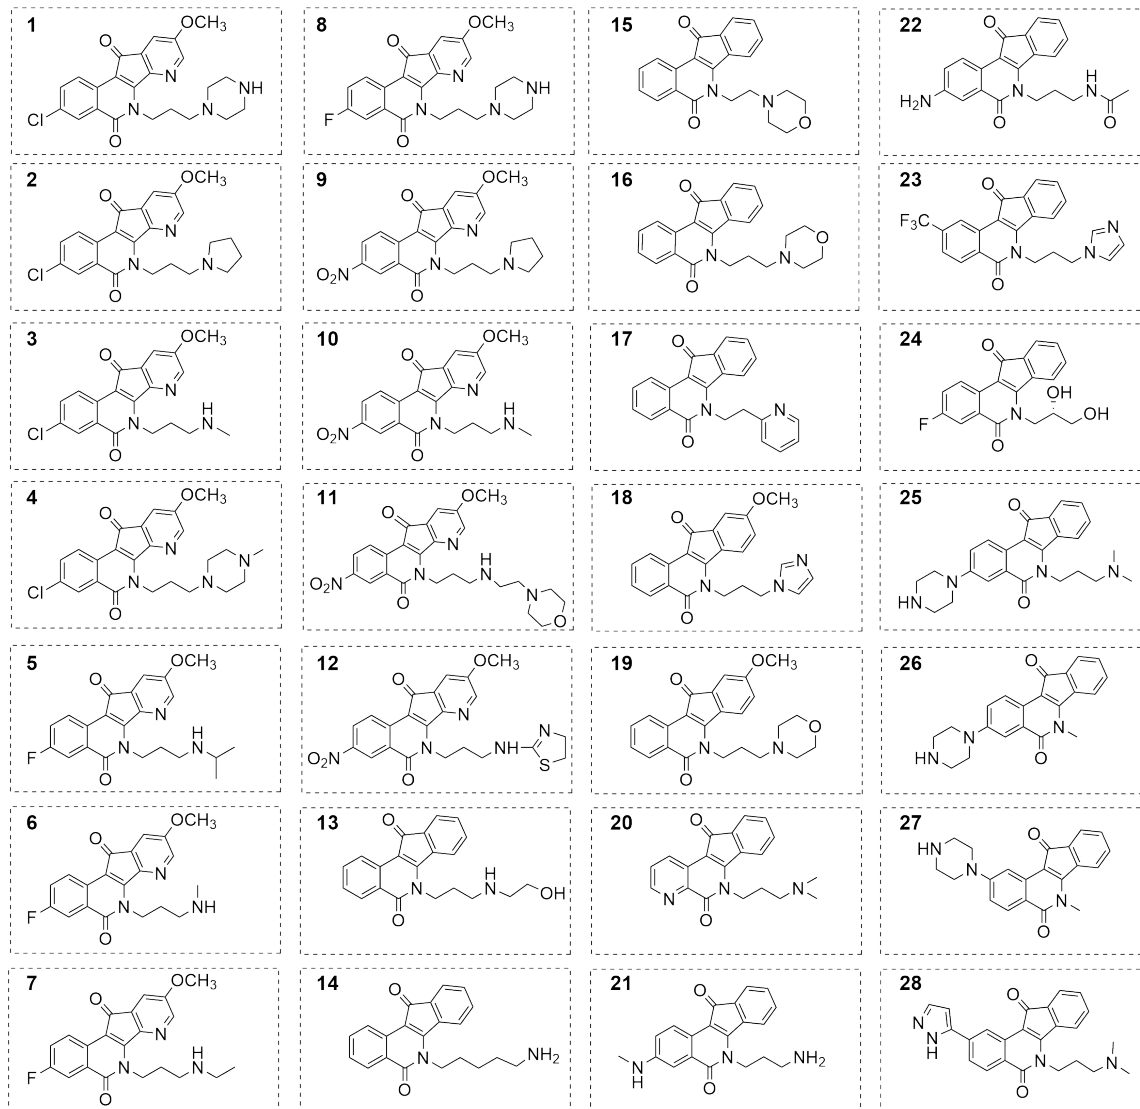

**Figure S1.** Chemical structures of the 56 indenoisoquinoline analogs.

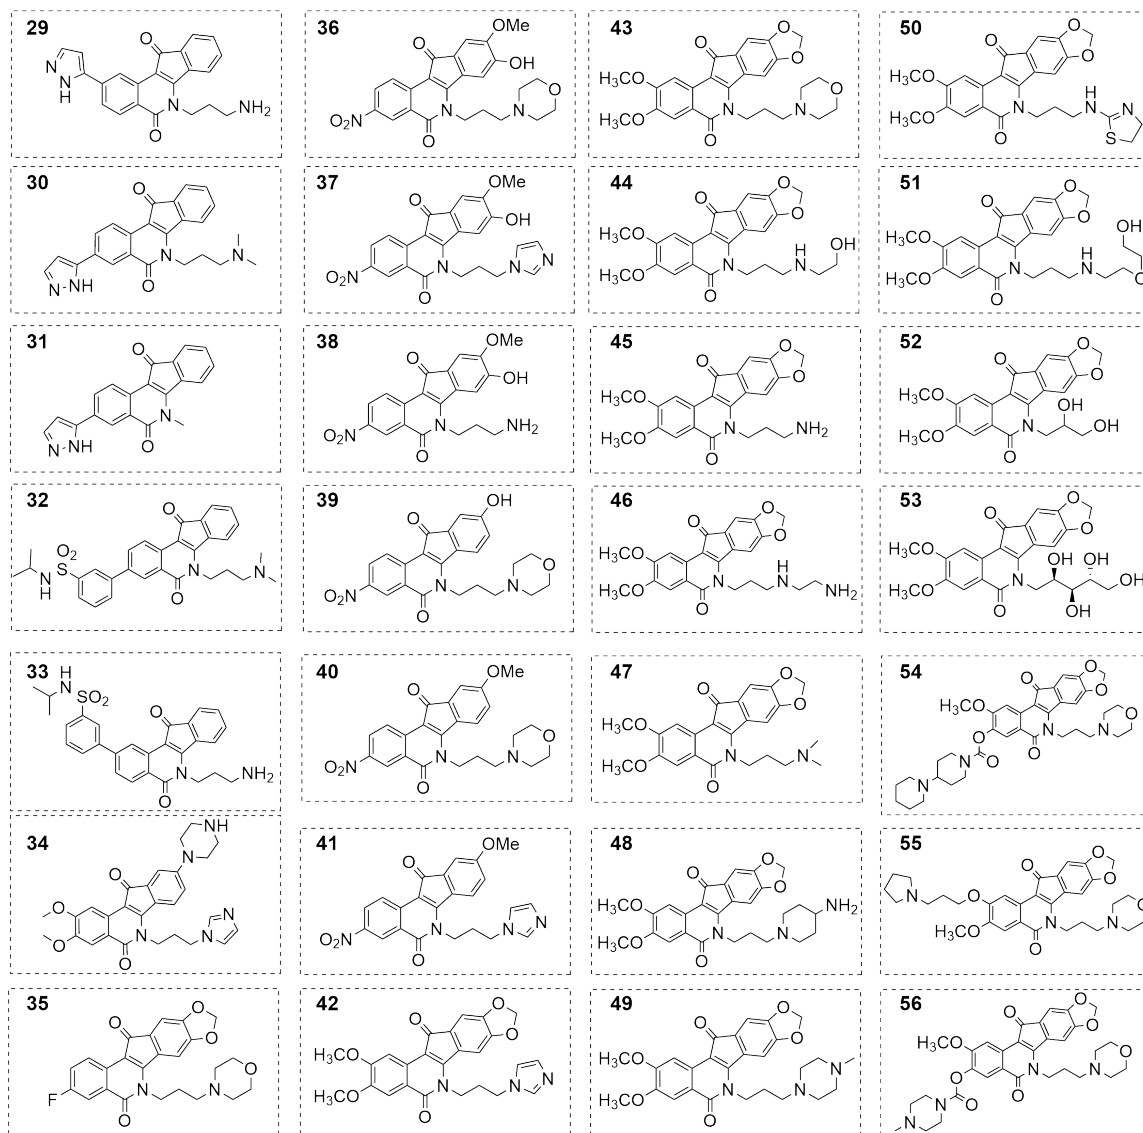

**Figure S1.** (continued)

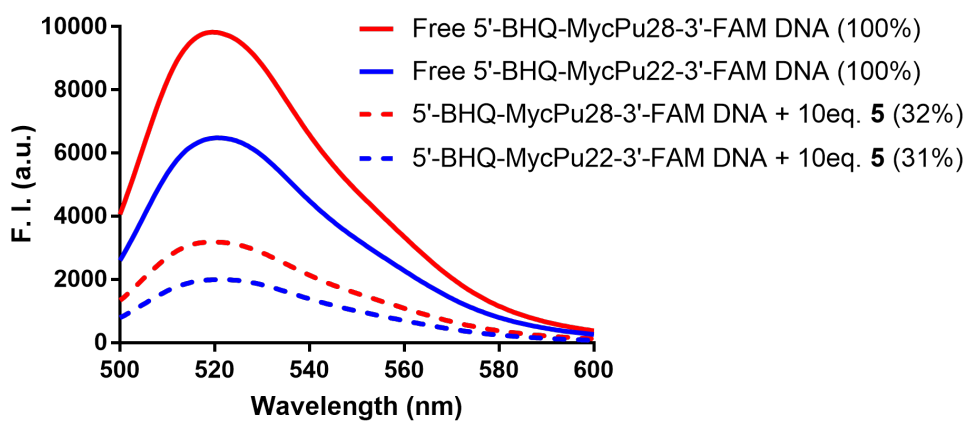

**Figure S2.** Fluorescence emission spectra of 5'-BHQ-MycPu28-3'-FAM (1  $\mu$ M) or 5'-BHQ-MycPu22-3'-FAM (1  $\mu$ M) in the presence or absence of 10  $\mu$ M indenoisoquinoline **5**. The levels of reduction in the fluorescence induced by indenoisoquinoline **5** are very similar for the MycPu28 and MycPu22, as shown by the numbers in parentheses. Conditions: 25  $^{\circ}$ C, 50 mM Tris·acetate, pH 7.

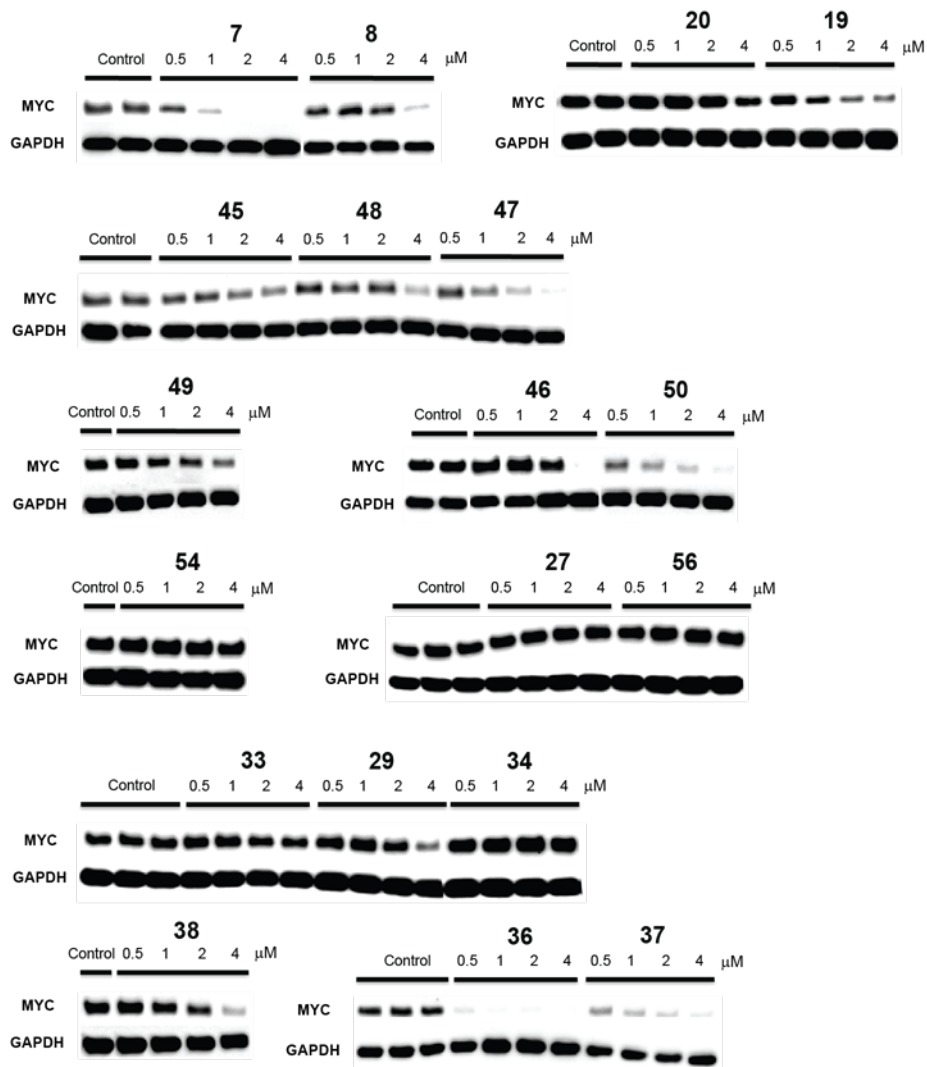

**Figure S3.** MYC protein expression levels in the absence and presence of various concentrations of indenoisoquinolines (24 h treatment) obtained by western blotting experiments in MCF-7 breast cancer cell lines. GAPDH was used as an internal control.

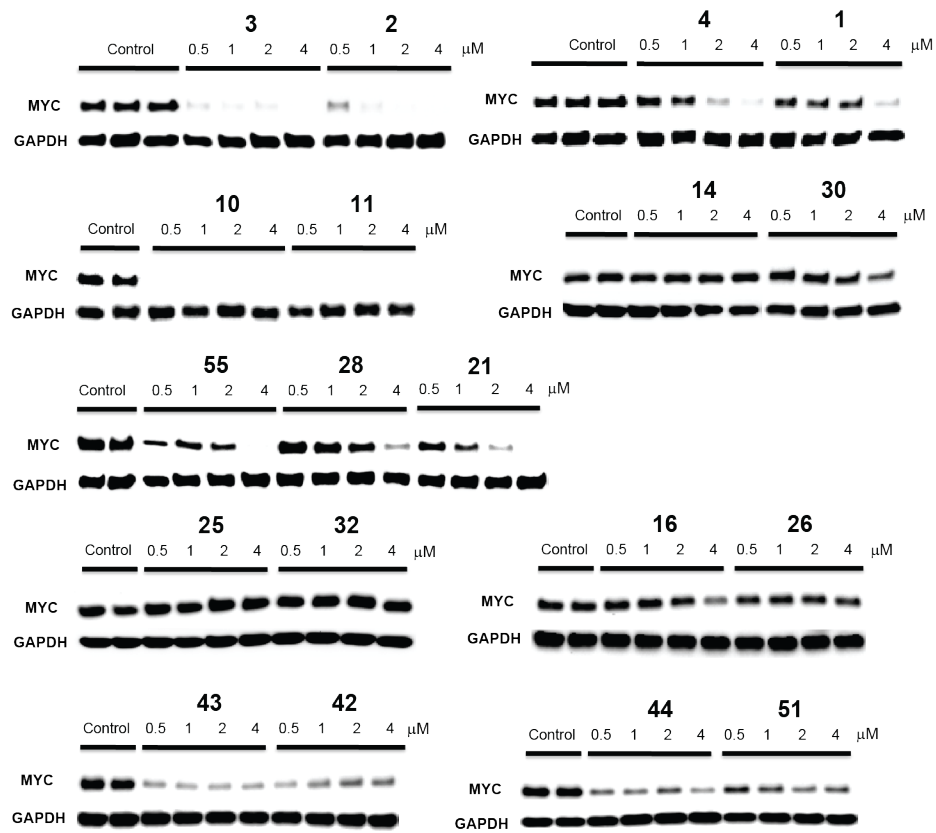

Figure S3. (continued)

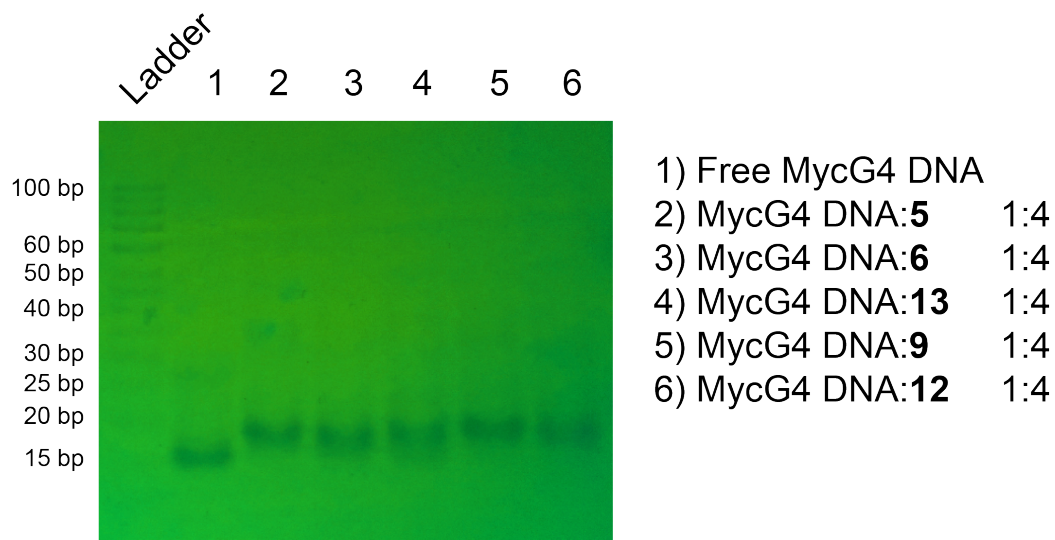

**Figure S4.** Native PAGE experiments of MycPu22 G-quadruplex DNA in the presence and absence of various indenoisoquinolines. DNA bands were visualized using UV light. Each sample contains 4  $\mu\text{L}$  of 150  $\mu\text{M}$  DNA. Conditions: 25  $^{\circ}\text{C}$ , TBE buffer containing 12.5 mM KCl, pH 8.0.

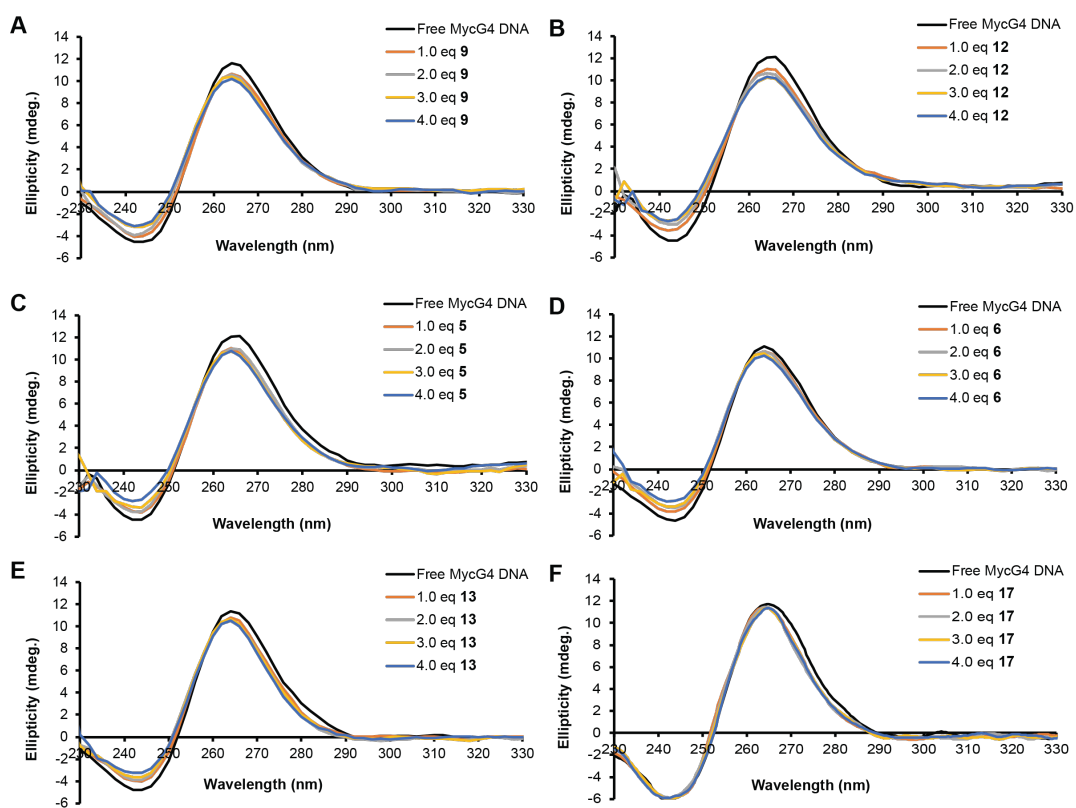

**Figure S5.** CD spectra of MycPu22 G-quadruplex DNA ( $15 \mu\text{M}$ ) with addition of 1, 2, 3, and 4 equivalents of indenoisoquinoline compound **9** (A), **12** (B), **5** (C), **6** (D), **13** (E), and **17** (F). Conditions:  $25 \text{ }^\circ\text{C}$ , pH 7,  $5 \text{ mM K}^+$ .

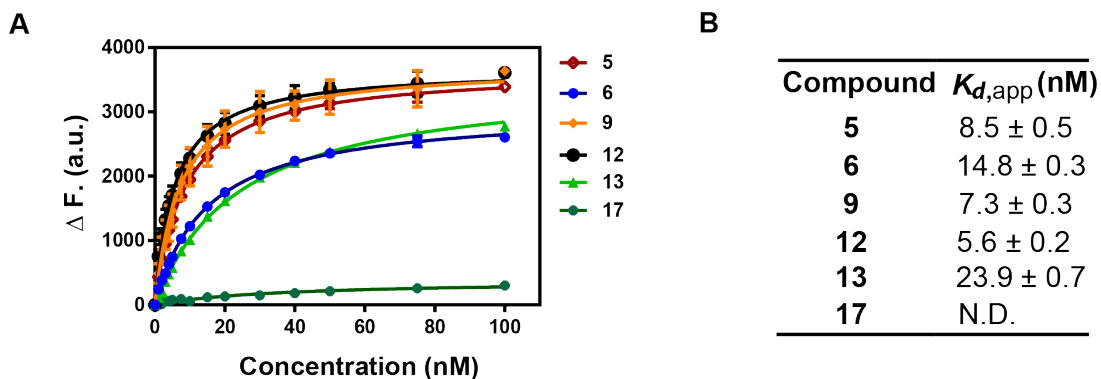

**Figure S6.** Apparent binding affinities of the five indenoisoquinolines with MycPu22 determined by fluorescence-based binding assay. (A) Fluorescence intensity change of 3'-TAMRA-labeled MycPu22 DNA (0.5 nM) at 580 nm upon respective titration of six indenoisoquinolines. Conditions: 20 °C, pH 7, 100 mM K<sup>+</sup>. (B) Apparent  $K_d$  values determined for six indenoisoquinolines. N.D. indicates that the value was not determined due to the negligible change of fluorescence signal. The apparent binding affinity  $K_d$  values were determined by fitting the data to a one-site specific binding model using GraphPad Prism software, with a simplified equation of  $\Delta F_{obs} = \Delta F_{max} \frac{[L]_T}{[L]_T + K_{d,app}}$ , where  $\Delta F$  represents the fluorescence intensity change of the indenoisoquinolines bound to MycPu22 DNA and  $[L]_T$  represents the total ligand concentration.



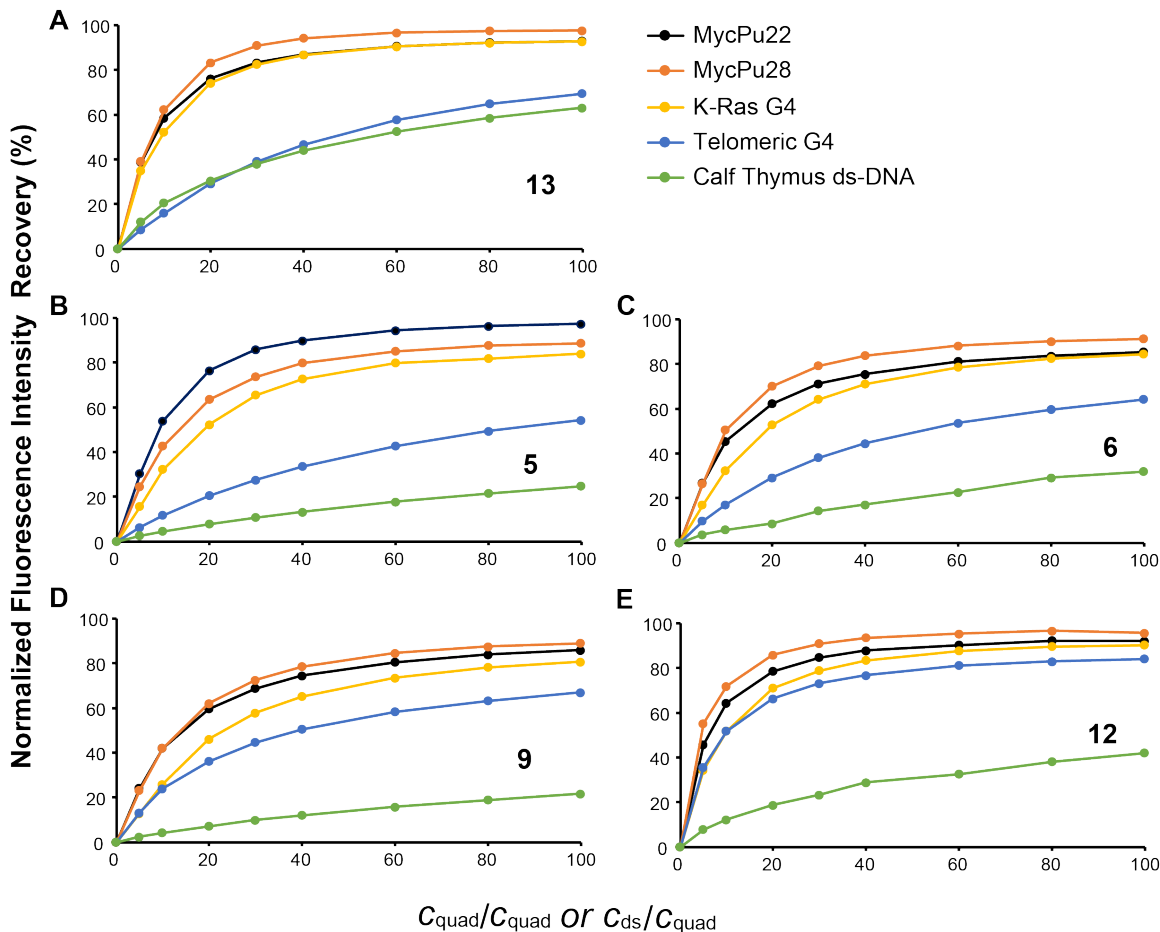

**Figure S7.** Binding selectivities of MycG4-interactive indenoisoquinolines. Competition fluorescence displacement experiments with increasing concentrations of unlabeled G4s and ds-DNA were added to 3'-TAMRA labeled MycPu22 (20 nM) mixed with 5 equivalents of indenoisoquinoline compound **13** (A), **5** (B), **6** (C), **9** (D), and **12** (E). The normalized TAMRA fluorescence intensities at 580 nm were plotted as a function of molar ratio of G4 (in 3 G-tetrads) or calf thymus ds-DNA (in 11 bp) to labeled MycPu22. The fluorescence intensity of free 3'-TAMRA-labeled MycPu22 was defined as 100%, and the fluorescence intensity of a 1:5 mixture of 3'-TAMRA-labeled MycPu22 and indenoisoquinoline was defined as 0%. Conditions: 20 °C, pH 7, 100 mM K<sup>+</sup>.

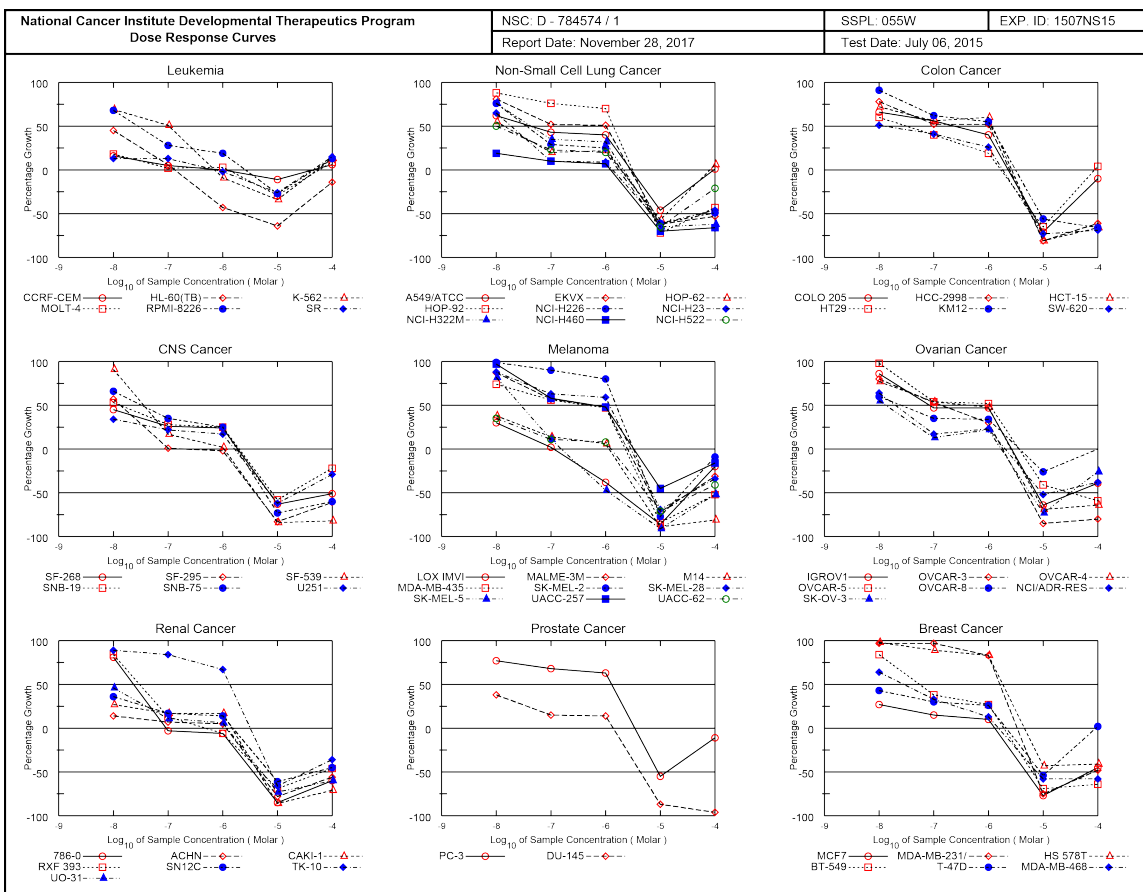

**Figure S8.** Example dose response curves from the NCI-60 cancer cell line drug screen (compound **12**). The response parameters  $GI_{50}$  (50% growth inhibition) and  $LC_{50}$  (50% lethal concentration) are extracted from concentration–response curves. TGI (total growth inhibition) is read as the x-axis intercept.

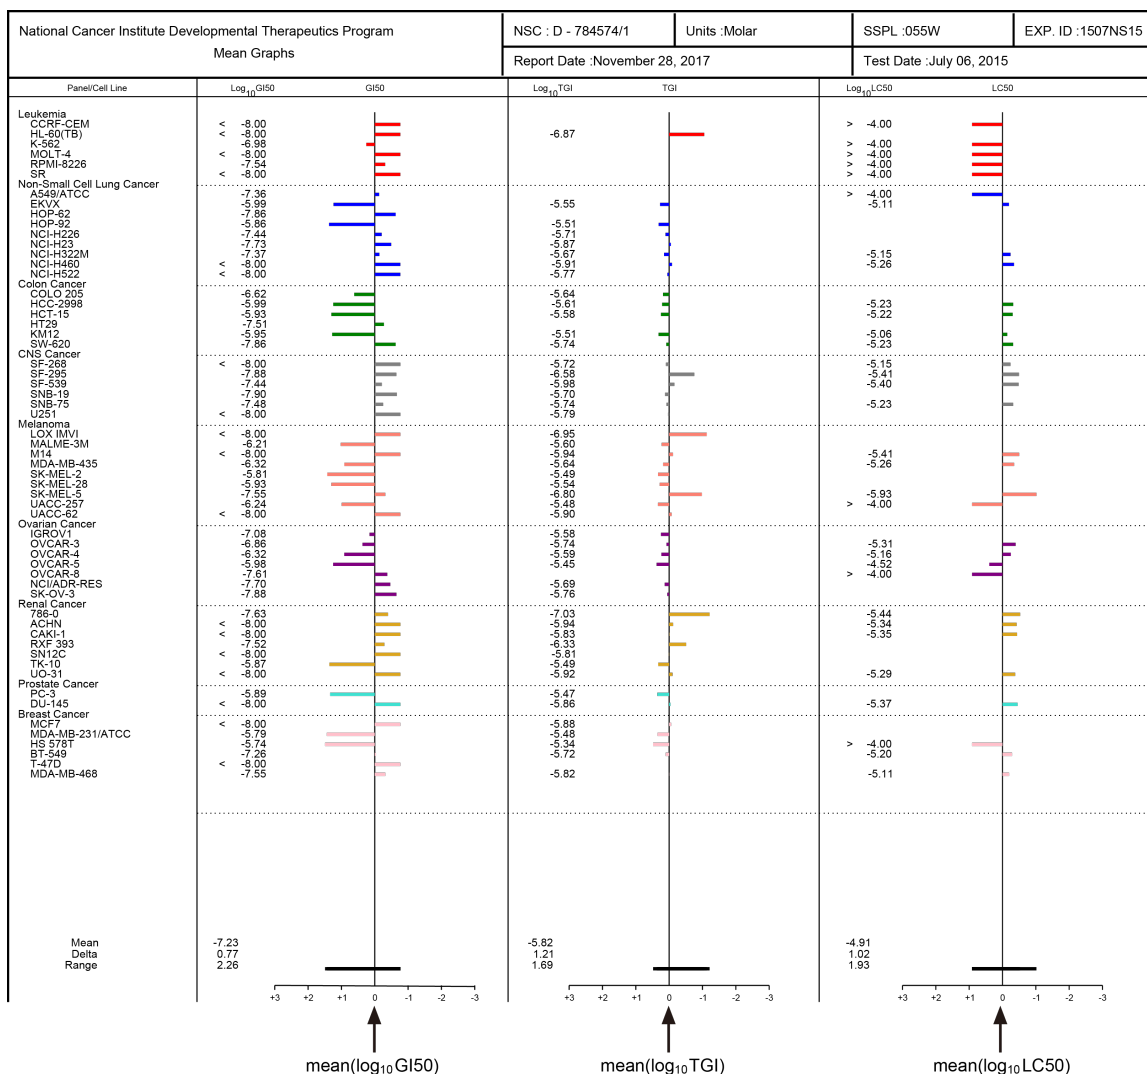

**Figure S9.** An example of Mean Graphs from the NCI-60 cancer cell line drug screen (compound **12**). Mean Graphs are constructed for GI<sub>50</sub>, TGI, and LC<sub>50</sub> values, with bars depicting the deviation of individual cancer cell lines from the overall mean value for all the NCI-60 cancer cell lines tested. GI<sub>50</sub> Mean Graph: 50% growth inhibition Mean Graph. TGI Mean Graph: total growth inhibition Mean Graph. LC<sub>50</sub> Mean Graph: 50% lethal concentration Mean Graph. The mean value across the entire panel of NCI-60 cancer cell lines (Mean), the maximum difference from the mean (Delta), and the difference between the highest and lowest values (Range) are indicated below each profile.

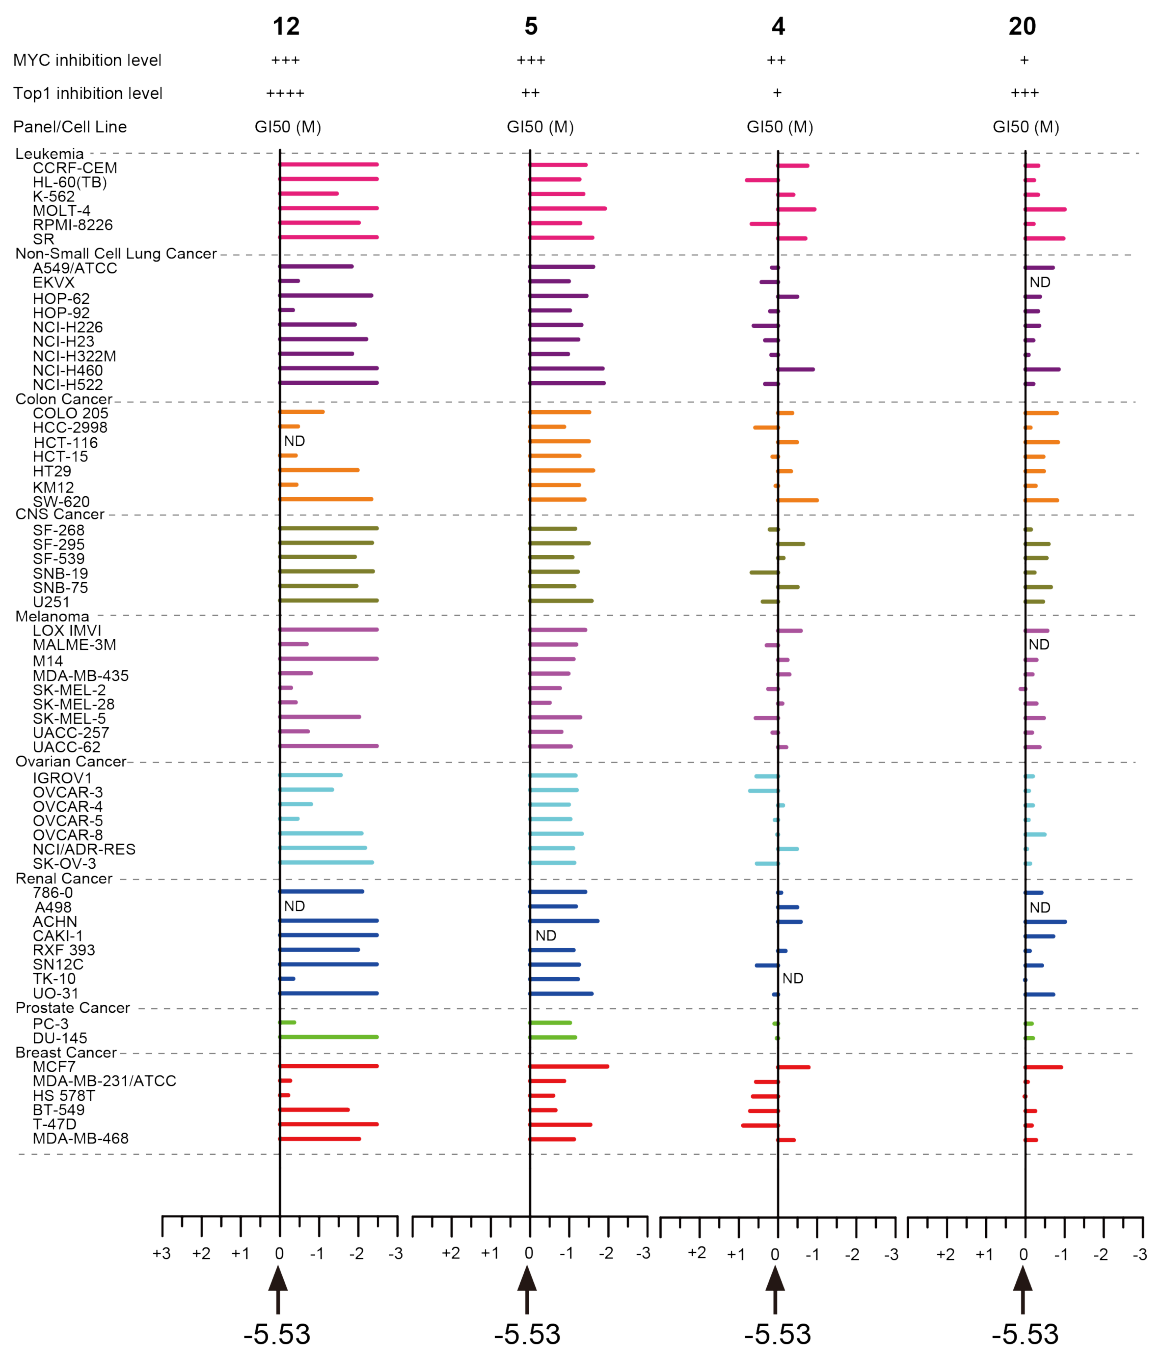

**Figure S10.** Bar graphs showing the antiproliferation profiles ( $GI_{50}$ ) of indenoisoquinoline **12**, **5**, **4**, and **20** from the NCI-60 cancer cell line drug screen. MYC inhibition and Topoisomerase I inhibition levels are shown at the top. Bar graphs are constructed for each compound, with bars depicting the deviation of individual cancer cell lines from the compound **4**  $mean(\log_{10}GI_{50})$  value of -5.53. Compounds **12** and **5** with strong MYC inhibition and topoisomerase I inhibition show more potent anticancer activities compared to compounds **4** and **20**. ND:  $GI_{50}$  value not determined.

## REFERENCES

1. Cushman, M.; Jayaraman, M.; Vroman, J. A.; Fukunaga, A. K.; Fox, B. M.; Kohlhagen, G.; Strumberg, D.; Pommier, Y., Synthesis of new indeno [1,2-*c*] isoquinolines: cytotoxic non-camptothecin topoisomerase I inhibitors. *J. Med. Chem.* **2000**, *43* (20), 3688-3698.
2. Wang, P.; Elsayed, M. S. A.; Plescia, C. B.; Ravji, A.; Redon, C. E.; Kiselev, E.; Marchand, C.; Zeleznik, O.; Agama, K.; Pommier, Y.; Cushman, M., Synthesis and biological evaluation of the first triple inhibitors of human topoisomerase I, tyrosyl-DNA phosphodiesterase 1 (Tdp1), and tyrosyl-DNA phosphodiesterase 2 (Tdp2). *J. Med. Chem.* **2017**, *60* (8), 3275-3288.
3. Elsayed, M. S. A.; Su, Y.; Wang, P.; Sethi, T.; Agama, K.; Ravji, A.; Redon, C. E.; Kiselev, E.; Horzmann, K. A.; Freeman, J. L.; Pommier, Y.; Cushman, M., Design and synthesis of chlorinated and fluorinated 7-azaindenoisoquinolines as potent cytotoxic anticancer agents that inhibit topoisomerase I. *J. Med. Chem.* **2017**, *60* (13), 5364-5376.
4. Cinelli, M. A.; Reddy, P. V.; Lv, P. C.; Liang, J. H.; Chen, L.; Agama, K.; Pommier, Y.; van Breemen, R. B.; Cushman, M., Identification, synthesis, and biological evaluation of metabolites of the experimental cancer treatment drugs indotecan (LMP400) and indimitecan (LMP776) and investigation of isomerically hydroxylated indenoisoquinoline analogues as topoisomerase I poisons. *J. Med. Chem.* **2012**, *55* (24), 10844-10862.
5. Nagarajan, M.; Morrell, A.; Ioanoviciu, A.; Antony, S.; Kohlhagen, G.; Agama, K.; Hollingshead, M.; Pommier, Y.; Cushman, M., Synthesis and evaluation of indenoisoquinoline topoisomerase I inhibitors substituted with nitrogen heterocycles. *J. Med. Chem.* **2006**, *49* (21), 6283-6289.
6. Nagarajan, M.; Morrell, A.; Fort, B. C.; Meckley, M. R.; Antony, S.; Kohlhagen, G.; Pommier, Y.; Cushman, M., Synthesis and anticancer activity of simplified indenoisoquinoline topoisomerase I inhibitors lacking substituents on the aromatic rings. *J. Med. Chem.* **2004**, *47* (23), 5651-5661.

7. Morrell, A.; Placzek, M.; Parmley, S.; Antony, S.; Dexheimer, T. S.; Pommier, Y.; Cushman, M., Nitratated indenoisoquinolines as topoisomerase I inhibitors: a systematic study and optimization. *J. Med. Chem.* **2007**, *50* (18), 4419-4430.
8. Conda-Sheridan, M.; Reddy, P. N.; Morrell, A.; Cobb, B. T.; Marchand, C.; Agama, K.; Chergui, A.; Renaud, A.; Stephen, A. G.; Bindu, L. K., Synthesis and biological evaluation of indenoisoquinolines that inhibit both tyrosyl-DNA phosphodiesterase I (Tdp1) and topoisomerase I (Top1). *J. Med. Chem.* **2012**, *56* (1), 182-200.
9. Beck, D. E.; Agama, K.; Marchand, C.; Chergui, A.; Pommier, Y.; Cushman, M., Synthesis and biological evaluation of new carbohydrate-substituted indenoisoquinoline topoisomerase I inhibitors and improved syntheses of the experimental anticancer agents indotecan (LMP400) and indimitecan (LMP776). *J. Med. Chem.* **2014**, *57* (4), 1495-1512.
